# Supplementary material for: Sinusoidal Vibration Source Localization in Two-Dimensional Space Around the Hand
Source: Frontiers journal article supplement (doi:10.3389/fpsyg.2022.878397), 2022-06-10
Supplement: Data_Sheet_1.PDF [file Data_Sheet_1.PDF]

## Supplementary Material

**Supplementary Figure 1.** Experimental Procedure. The experiment was composed of a familiarization phase and a test phase.

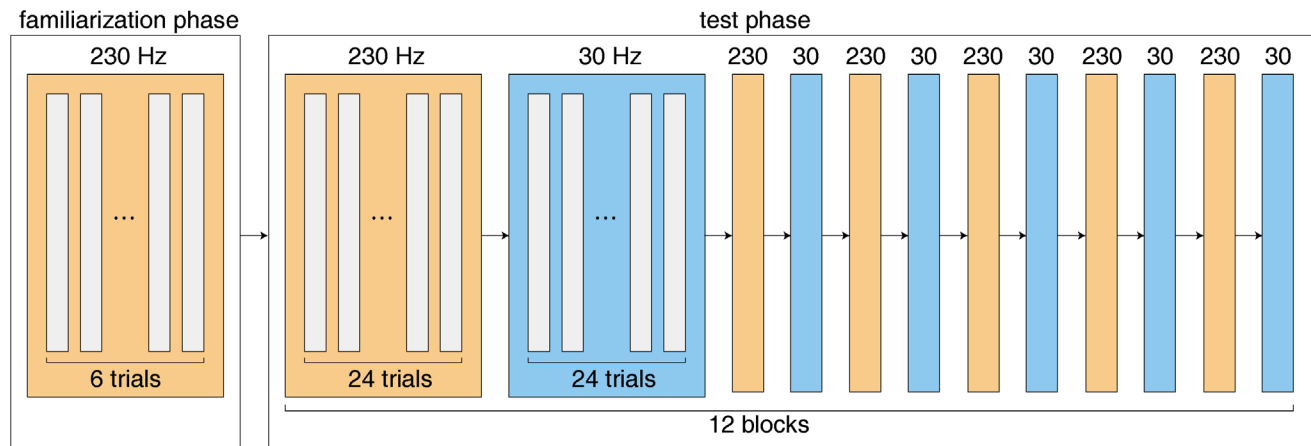

**Supplementary Table 1.** 3-way ANOVA results of the directional bias

|                                                    | F     | Df | p      |
|----------------------------------------------------|-------|----|--------|
| stimulus direction                                 | 16.51 | 7  | 0.0001 |
| stimulus distance                                  | 13.39 | 2  | 0.250  |
| frequency                                          | 0.17  | 1  | 0.684  |
| stimulus direction * stimulus distance             | 1.00  | 14 | 0.449  |
| stimulus direction * frequency                     | 4.36  | 7  | 0.0001 |
| stimulus distance * frequency                      | 1.85  | 2  | 0.159  |
| stimulus direction * stimulus distance * frequency | 1.19  | 14 | 0.276  |

**Supplementary Table 2.** 3-way ANOVA results of the standard deviation of directional bias.

|                                                    | F     | Df | p      |
|----------------------------------------------------|-------|----|--------|
| stimulus direction                                 | 11.51 | 7  | 0.0001 |
| stimulus distance                                  | 55.16 | 2  | 0.0001 |
| frequency                                          | 61.19 | 1  | 0.0001 |
| stimulus direction * stimulus distance             | 1.94  | 14 | 0.021  |
| stimulus direction * frequency                     | 5.76  | 7  | 0.0001 |
| stimulus distance * frequency                      | 27.47 | 2  | 0.0001 |
| stimulus direction * stimulus distance * frequency | 2.19  | 14 | 0.008  |
